# Supplementary material
Source: PubMed Central journal article supplement (PMC5177465)
Supplement: NIHMS827194-supplement-Supplemental_Digital_Content.pdf [file NIHMS827194-supplement-Supplemental_Digital_Content.pdf]

**Appendix 1. List of International Statistical Classification of Diseases and Related Health Problems, version 10 (ICD-10) codes used in the study.**

| CD-10 code | Condition                                                                                                                     |
|------------|-------------------------------------------------------------------------------------------------------------------------------|
| O00-O07    | Pregnancy with abortive outcome                                                                                               |
| O10-O16    | Edema, proteinuria and hypertensive disorders in pregnancy, childbirth and the puerperium                                     |
| O11        | Pre-existing hypertensive disorder with superimposed proteinuria                                                              |
| O14        | Gestational hypertension with significant proteinuria                                                                         |
| O15        | Eclampsia                                                                                                                     |
| O20-29     | Other maternal disorders predominantly related to pregnancy                                                                   |
| O24        | Diabetes mellitus in pregnancy                                                                                                |
| O26        | Maternal care for other conditions predominantly related to pregnancy                                                         |
| O26.6      | Liver disorders in pregnancy, childbirth and the puerperium                                                                   |
| O26.8      | Other specified pregnancy-related conditions (pregnancy-related exhaustion and fatigue, peripheral neuritis or renal disease) |
| O30-O48    | Maternal care related to the fetus and amniotic cavity and possible delivery problems                                         |
| O44        | Placenta previa                                                                                                               |
| O45        | Premature separation of the placenta (abruptio placentae)                                                                     |
| O46        | Antepartum hemorrhage, not elsewhere classified                                                                               |
| O60-O75    | Complications of labor and delivery                                                                                           |
| O72        | Postpartum hemorrhage                                                                                                         |
| O85-O92    | Complications predominantly related to the puerperium                                                                         |
| O95-O99    | Other obstetric conditions not elsewhere classified                                                                           |
| O95        | Obstetric death of unspecified cause                                                                                          |
| O96        | Death from any obstetric cause occurring more than 42 days but less than 1 year after delivery                                |
| O97        | Death from sequelae of direct obstetric causes                                                                                |
| O99        | Other maternal diseases classifiable elsewhere but complicating pregnancy, childbirth and the puerperium                      |
| O99.4      | Diseases of the circulatory system complicating pregnancy, childbirth and the puerperium                                      |

Joseph KS, Lisonkova S, Muraca GM, Razaz N, Sabr Y, Mehrabadi A, et al. Factors underlying the temporal increase in maternal mortality in the United States. *Obstet Gynecol* 2017; 129.

The authors provided this information as a supplement to their article.

**Appendix 2. Overall and Cause-Specific Maternal Mortality Ratios (MMR per 100,000 Live Births), United States, 1999 to 2014**

| Year | MMR per 100,000 live births | Cause-specific maternal mortality ratios (per 100,000 live births) |                                              |                                     |                         |                                               |                                                   |                                           |                                              |
|------|-----------------------------|--------------------------------------------------------------------|----------------------------------------------|-------------------------------------|-------------------------|-----------------------------------------------|---------------------------------------------------|-------------------------------------------|----------------------------------------------|
|      |                             | Pregnancy with abortive outcome (O00-O07)                          | Proteinuria/hypertensive disorders (O10-O16) | Other pregnancy disorders (O20-O29) | Maternal care (O30-O48) | Complications of labor and delivery (O60-O75) | Complications related to the puerperium (O85-O92) | Other obstetric conditions (O95,O98, O99) | Late maternal deaths and sequelae (O96,O97*) |
| 1999 | 10.3                        | 0.78                                                               | 2.37                                         | 0.73                                | 1.04                    | 1.52                                          | 2.12                                              | 1.31                                      | 0.38                                         |
| 2000 | 10.0                        | 0.91                                                               | 1.87                                         | 1.03                                | 0.57                    | 1.63                                          | 2.29                                              | 1.45                                      | 0.20                                         |
| 2001 | 10.3                        | 0.94                                                               | 1.91                                         | 0.97                                | 0.77                    | 1.52                                          | 2.51                                              | 1.29                                      | 0.42                                         |
| 2002 | 9.4                         | 0.55                                                               | 1.49                                         | 1.59                                | 0.52                    | 1.44                                          | 2.04                                              | 1.24                                      | 0.55                                         |
| 2003 | 13.3                        | 0.98                                                               | 1.88                                         | 1.74                                | 0.68                    | 1.81                                          | 2.15                                              | 2.86                                      | 1.22                                         |
| 2004 | 17.0                        | 0.78                                                               | 1.51                                         | 2.33                                | 0.88                    | 1.14                                          | 2.48                                              | 4.01                                      | 3.82                                         |
| 2005 | 18.4                        | 0.80                                                               | 1.62                                         | 2.97                                | 0.63                    | 1.23                                          | 2.95                                              | 4.86                                      | 3.31                                         |
| 2006 | 17.8                        | 0.61                                                               | 1.50                                         | 3.12                                | 0.52                    | 1.55                                          | 2.56                                              | 3.49                                      | 4.48                                         |
| 2007 | 17.8                        | 0.72                                                               | 1.74                                         | 2.69                                | 0.46                    | 1.34                                          | 2.15                                              | 3.59                                      | 5.12                                         |
| 2008 | 18.7                        | 0.80                                                               | 1.86                                         | 3.39                                | 0.71                    | 1.46                                          | 2.68                                              | 4.64                                      | 3.18                                         |
| 2009 | 23.2                        | 0.82                                                               | 1.62                                         | 4.21                                | 0.58                    | 1.11                                          | 2.71                                              | 5.52                                      | 6.66                                         |
| 2010 | 20.6                        | 0.93                                                               | 1.73                                         | 4.10                                | 0.80                    | 1.20                                          | 2.53                                              | 5.58                                      | 3.78                                         |
| 2011 | 23.5                        | 0.68                                                               | 2.15                                         | 5.21                                | 0.86                    | 1.26                                          | 2.43                                              | 6.75                                      | 4.20                                         |

Joseph KS, Lisonkova S, Muraca GM, Razaz N, Sabr Y, Mehrabadi A, et al. Factors underlying the temporal increase in maternal mortality in the United States. *Obstet Gynecol* 2017; 129.

The authors provided this information as a supplement to their article.

|                 |            |             |             |            |             |              |             |            |            |
|-----------------|------------|-------------|-------------|------------|-------------|--------------|-------------|------------|------------|
| 2012            | 25.0       | 0.43        | 1.92        | 6.22       | 0.61        | 1.09         | 2.25        | 7.39       | 5.14       |
| 2013            | 28.9       | 0.69        | 2.29        | 6.92       | 0.71        | 0.84         | 3.26        | 7.27       | 6.97       |
| 2014            | 28.2       | 0.70        | 1.88        | 7.35       | 0.85        | 0.65         | 2.31        | 7.72       | 6.69       |
| Rate ratio      | 2.75       | 0.90        | 0.79        | 10.0       | 0.82        | 0.43         | 1.09        | 5.88       | 17.7       |
| 95% CI          | 2.45, 3.08 | 0.54, 1.49  | 0.58, 1.07  | 6.85, 14.7 | 0.52, 1.30  | 0.27, 0.68   | 0.81, 1.46  | 4.38, 7.89 | 10.5, 29.7 |
| Rate difference | 17.9       | -0.08       | -0.49       | 6.62       | -0.19       | -0.87        | 0.19        | 6.41       | 6.32       |
| 95% CI          | 14.9, 21.4 | -0.36, 0.38 | -1.00, 0.17 | 4.27, 10.0 | -0.50, 0.31 | -1.11, -0.49 | -0.40, 0.98 | 4.44, 9.05 | 3.60, 10.9 |
| P value         | <0.0001    | 0.68        | 0.13        | <0.0001    | 0.40        | 0.0002       | 0.58        | <0.0001    | <0.0001    |

\* Late maternal deaths not included in maternal mortality ratios (MMR) in the first column.

Joseph KS, Lisonkova S, Muraca GM, Razaz N, Sabr Y, Mehrabadi A, et al. Factors underlying the temporal increase in maternal mortality in the United States. *Obstet Gynecol* 2017; 129.

The authors provided this information as a supplement to their article.

**Appendix 3. Numbers of Maternal Deaths (Including Late Maternal Deaths\*) and Maternal Mortality Ratios (MMR) by Age, Race and Place of Death, United States, 1993 and 2014**

| Determinant                                               | 1993       |                  |                     | 2014         |                  |                    | Rate ratio<br>2014 vs 1993 | 95%<br>confidence<br>interval | P value           |
|-----------------------------------------------------------|------------|------------------|---------------------|--------------|------------------|--------------------|----------------------------|-------------------------------|-------------------|
|                                                           | Deaths     | Live<br>births   | MMR/<br>proportion† | Deaths       | Live<br>births   | MMR<br>proportion† |                            |                               |                   |
| <u>All maternal deaths including late maternal deaths</u> |            |                  |                     |              |                  |                    |                            |                               |                   |
| Age <25 years                                             | 84         | 1,551,774        | 5.41                | 165          | 1,134,414        | 14.5               | 2.69                       | 2.07-3.49                     | <0.0001           |
| 25-34                                                     | 136        | 2,030,013        | 6.70                | 405          | 2,226,450        | 18.29              | 2.72                       | 2.24-3.30                     | <0.0001           |
| 35-44                                                     | 82         | 416,124          | 19.71               | 350          | 618,769          | 56.6               | 2.87                       | 2.26-3.65                     | <0.0001           |
| ≥45                                                       | 0          | 2,329            | 0.00                | 202          | 8,443            | 2392.5             | -                          | -                             | 0.0009            |
| Race: White                                               | 152        | 3,149,833        | 4.83                | 691          | 3,019,863        | 22.9               | 4.74                       | 3.98-5.65                     | <0.0001           |
| African American                                          | 135        | 658,875          | 20.49               | 370          | 640,562          | 57.8               | 2.82                       | 2.31-3.43                     | <0.0001           |
| Other                                                     | 15         | 191,532          | 7.83                | 62           | 327,651          | 18.9               | 2.42                       | 1.37-4.25                     | 0.002             |
| Hospital - inpatient                                      | 202        | -                | 66.89               | 674          | -                | 60.0               | 0.90                       | 0.82-0.98                     | 0.02              |
| Hospital-outpatient/ER                                    | 55         | -                | 18.21               | 180          | -                | 16.0               | 0.88                       | 0.67-1.16                     | 0.91              |
| Home                                                      | 30         | -                | 9.93                | 195          | -                | 17.4               | 1.75                       | 1.22-2.51                     | 0.003             |
| Hospice                                                   | 0          | -                | 0.00                | 32           | -                | 2.85               | -                          |                               | 0.04              |
| Other                                                     | 14         | -                | 4.64                | 42           | -                | 3.74               | 0.81                       | 0.45-1.46                     | 0.48              |
| <b>Total</b>                                              | <b>302</b> | <b>4,000,240</b> | <b>7.55</b>         | <b>1,123</b> | <b>3,988,076</b> | <b>28.2</b>        | <b>3.73</b>                | <b>3.28-4.24</b>              | <b>&lt;0.0001</b> |

\* Late maternal deaths identified by ICD-10 codes O96 and O97 included among maternal deaths.

† Age- and race-specific MMRs expressed per 100,000 live births; rates by place of death expressed as a proportion of all maternal deaths.

**Appendix 4. All-cause mortality (primary y-axis) and all maternal deaths (secondary y-axis) (A), deaths from circulatory system causes (primary y-axis) and maternal deaths from circulatory system causes (secondary y-axis) (B), deaths from renal disorders (primary y-axis) and maternal deaths from renal disorders (secondary y-axis) (C), and deaths from diabetes mellitus (primary y-axis) and maternal deaths from diabetes mellitus (secondary y-axis) (D) per 1,000,000 women aged 15–44 years in the United States, 1999–2014.**

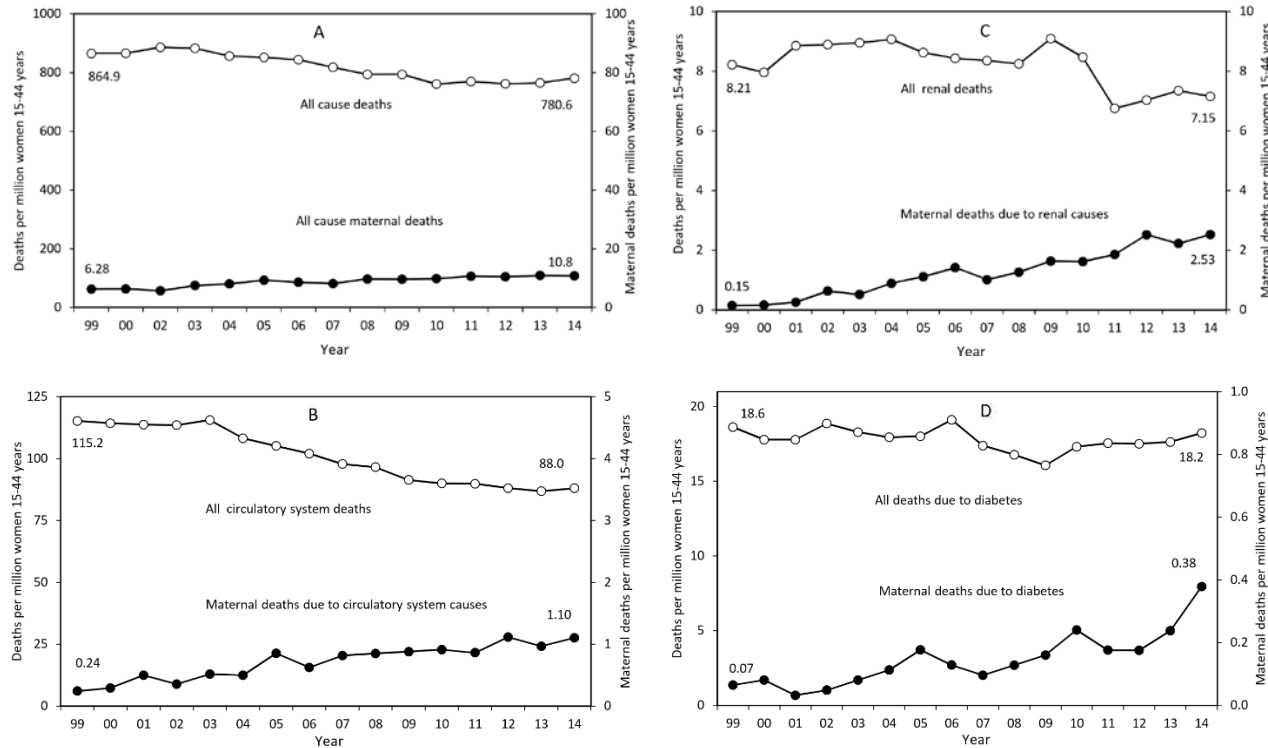

Joseph KS, Lisonkova S, Muraca GM, Razaz N, Sabr Y, Mehrabadi A, et al. Factors underlying the temporal increase in maternal mortality in the United States. *Obstet Gynecol* 2017; 129.

The authors provided this information as a supplement to their article.

**Appendix 5. Results of Poisson regression analysis showing crude and adjusted maternal mortality rate ratios and 95% confidence intervals, with late maternal deaths excluded (A), and included (B) in the calculation of maternal mortality ratios, United States, 1993 to 2014. The adjusted models included variables for a separate pregnancy question on the death certificate, International Classification of Diseases (ICD-10) coding and a standard pregnancy checkbox on the death certificate.**

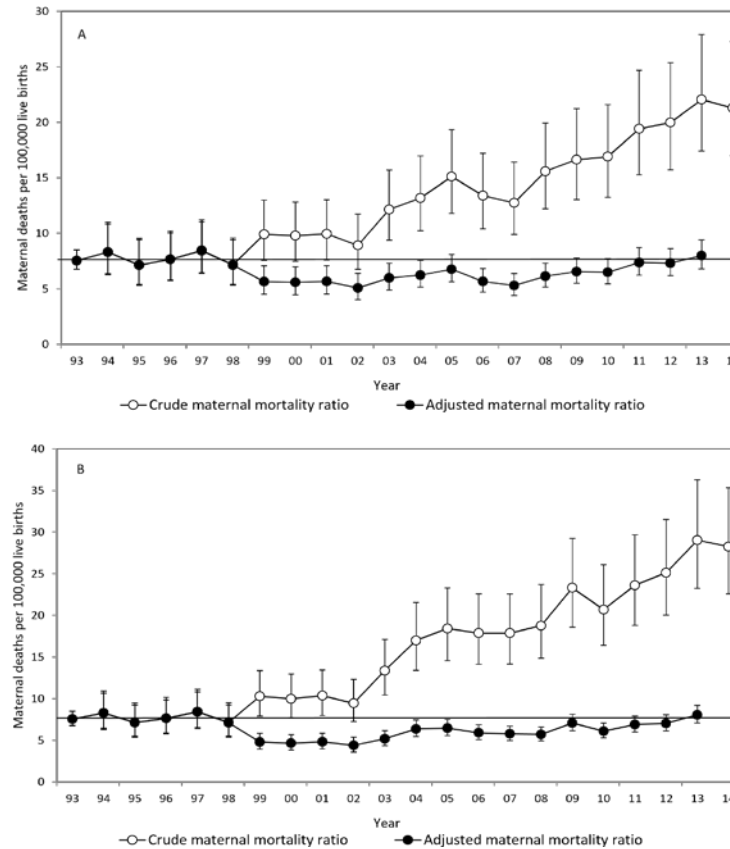

Joseph KS, Lisonkova S, Muraca GM, Razaz N, Sabr Y, Mehrabadi A, et al. Factors underlying the temporal increase in maternal mortality in the United States. *Obstet Gynecol* 2017; 129.

The authors provided this information as a supplement to their article.

**Appendix 6. Maternal Mortality Ratios Including Late Maternal Deaths (per 100,000 Live Births), and Crude and Adjusted Maternal Mortality Rate Ratios, United States, 1993 to 2014**

| Year              | Maternal mortality ratio | Unadjusted |                         |           | Adjusted*  |                         |           |
|-------------------|--------------------------|------------|-------------------------|-----------|------------|-------------------------|-----------|
|                   |                          | Rate ratio | 95% confidence interval | P value   | Rate ratio | 95% confidence interval | P value   |
| Separate question | -                        | 0.65       | 0.59-0.71               | <0.0001   | 1.14       | 1.06-1.24               | 0.001     |
| ICD-10 coding     | -                        | 2.38       | 2.15-2.63               | <0.0001   | 2.13       | 2.02-2.25               | <0.0001   |
| Checkbox          | -                        | 2.54       | 2.40-2.69               | <0.0001   | 1.90       | 1.74-2.07               | <0.0001   |
| 1993              | 7.55                     | 1.00       | Reference               | Reference | 1.00       | Reference               | Reference |
| 1994              | 8.28                     | 1.10       | 0.84-1.45               | 0.50      | 1.10       | 0.86-1.41               | 0.46      |
| 1995              | 7.10                     | 0.94       | 0.71-1.26               | 0.69      | 0.94       | 0.73-1.23               | 0.67      |
| 1996              | 7.63                     | 1.01       | 0.77-1.34               | 0.92      | 1.01       | 0.78-1.31               | 0.94      |
| 1997              | 8.43                     | 1.12       | 0.85-1.47               | 0.42      | 1.12       | 0.87-1.43               | 0.39      |
| 1998              | 7.13                     | 0.95       | 0.71-1.26               | 0.71      | 0.94       | 0.73-1.22               | 0.66      |
| 1999              | 10.3                     | 1.36       | 1.05-1.77               | 0.02      | 0.64       | 0.52-0.77               | <0.0001   |
| 2000              | 10.0                     | 1.32       | 1.02-1.72               | 0.04      | 0.62       | 0.51-0.75               | <0.0001   |
| 2001              | 10.3                     | 1.37       | 1.06-1.78               | 0.02      | 0.64       | 0.53-0.78               | <0.0001   |
| 2002              | 9.42                     | 1.25       | 0.96-1.63               | 0.10      | 0.58       | 0.48-0.71               | <0.0001   |
| 2003              | 13.3                     | 1.77       | 1.38-2.27               | <0.0001   | 0.69       | 0.58-0.82               | <0.0001   |
| 2004              | 17.0                     | 2.25       | 1.78-2.86               | <0.0001   | 0.84       | 0.72-0.99               | 0.03      |
| 2005              | 18.4                     | 2.44       | 1.93-3.08               | <0.0001   | 0.86       | 0.74-1.00               | 0.05      |
| 2006              | 17.8                     | 2.37       | 1.87-2.99               | <0.0001   | 0.78       | 0.67-0.91               | 0.001     |
| 2007              | 17.8                     | 2.37       | 1.87-2.99               | <0.0001   | 0.77       | 0.66-0.89               | 0.0004    |
| 2008              | 18.7                     | 2.49       | 1.97-3.14               | <0.0001   | 0.76       | 0.65-0.87               | 0.0002    |
| 2009              | 23.2                     | 3.09       | 2.46-3.88               | <0.0001   | 0.94       | 0.82-1.08               | 0.37      |
| 2010              | 20.6                     | 2.74       | 2.17-3.46               | <0.0001   | 0.81       | 0.70-0.93               | 0.004     |
| 2011              | 23.5                     | 3.13       | 2.49-3.93               | <0.0001   | 0.91       | 0.79-1.05               | 0.20      |
| 2012              | 25.0                     | 3.33       | 2.65-4.17               | <0.0001   | 0.93       | 0.81-1.07               | 0.32      |
| 2013              | 28.9                     | 3.85       | 3.08-4.81               | <0.0001   | 1.07       | 0.94-1.22               | 0.33      |
| 2014              | 28.2                     | 3.74       | 2.99-4.68               | <0.0001   | -†         | -†                      | -†        |

\* Adjusted for a separate pregnancy question on death certificates, International Statistical Classification of Diseases and Related Health Problems (ICD-10) coding, and the standard pregnancy checkbox on death certificates.

† Indicator variable for the year 2014 aliased as it was a linear combination of the other variables (collinearity).

The regression equation is:  $\text{Log P}(\text{maternal death}) = -9.5502 + (0.0947 * v_{1994}) + (-0.0574 * v_{1995}) + (0.0102 * v_{1996}) + (0.1091 * v_{1997}) + (-0.0580 * v_{1998}) + (0.4535 * v_{1999}) + (-0.4832 * v_{2000}) + (-0.4483 * v_{2001}) + (-0.5403 * v_{2002}) + (-0.3748 * v_{2003}) + (-0.1704 * v_{2004}) + (-0.1543 * v_{2005}) + (-0.2451 * v_{2006}) + (-0.2675 * v_{2007}) + (-0.2804 * v_{2008}) + (-0.0638 * v_{2009}) + (-0.2118 * v_{2010}) + (-0.0908 * v_{2011}) + (-0.0699 * v_{2012}) + (0.0660 * v_{2013}) + (0.1334 * \text{Separate question}) + (0.7575 * \text{ICD10}) + (0.6415 * \text{Standard checkbox})$ .

Joseph KS, Lisonkova S, Muraca GM, Razaz N, Sabr Y, Mehrabadi A, et al. Factors underlying the temporal increase in maternal mortality in the United States. *Obstet Gynecol* 2017; 129.

The authors provided this information as a supplement to their article.
